# Supplementary material
Source: Research Square preprint supplement (doi:10.21203/rs.3.rs-10009053/v1)
Supplement: Supplementary file 1 [file 0f5064c4faa38893c694b133.docx]

**Supplementary Material Table S2. School-level characteristics by trial arm**

| **School-level characteristic** | **YSLQQ (35 schools)** | **Control (33 schools)** |
| --- | --- | --- |
| Students per school (Baseline), mean (SD) | 136.5 (37.0) | 129.7 (47.4) |
| Students per school, median (IQR) | 136 (112–150) | 118 (96–149) |
| Subsidized schools, n (%) | 27 (77.1%) | 25 (75.8%) |
| IVE-SINAE, mean (SD) | 80.1 (10.7) | 83.5 (11.9) |
| Post-intervention assessed per school, mean (SD) | 112.3 (30.5) | 110.2 (45.4) |
| Follow-up assessed per school, mean (SD) | 83.6 (35.9) | 83.8 (44.4) |

**Note.** IVE-SINAE = School Vulnerability Index. School-level summaries are calculated across randomized schools that contributed baseline data.
