# Supplementary material
Source: Research Square preprint supplement (doi:10.21203/rs.3.rs-10009053/v1)
Supplement: Supplementary file 2 [file 2131bd8c9219a557ccb9ae12.docx]

**Supplementary Material Table S3. Baseline characteristics of students retained versus lost to follow-up**

| **Variable** | **Retained at follow-up (n=5693)** | **Lost to follow-up (n=3362)** | **SMD** | **p** |
| --- | --- | --- | --- | --- |
| YSLQQ group | 2926 (51.4%) | 1850 (55.0%) | -0.07 | .447 |
| Female sex | 2827 (49.7%) | 1697 (50.5%) | -0.02 | .469 |
| 7th grade | 3014 (52.9%) | 1473 (43.8%) | 0.18 | <.001 |
| Age, mean (SD) | 11.66 (0.70) | 11.63 (0.76) | 0.05 | .124 |
| Subsidized school | 4608 (80.9%) | 2678 (79.7%) | 0.03 | .619 |
| IVE-SINAE, mean (SD) | 81.67 (11.56) | 81.58 (11.64) | 0.01 | .942 |
| 30-day alcohol use | 277 (4.9%) | 215 (6.4%) | -0.07 | .004 |
| 30-day tobacco use | 63 (1.1%) | 49 (1.5%) | -0.03 | .195 |
| 30-day cannabis use | 47 (0.8%) | 42 (1.3%) | -0.04 | .097 |
| 30-day drunkenness | 37 (0.7%) | 45 (1.3%) | -0.07 | .002 |

**Note.** SMD = standardized mean difference. P-values are from univariable models with robust standard errors clustered at the school level. Retained refers to students assessed at the 4-month follow-up.
