# Supplementary material
Source: Research Square preprint supplement (doi:10.21203/rs.3.rs-10009053/v1)
Supplement: Supplementary file 3 [file 2d8fe42c51d7b6fadca5077e.docx]

**Supplementary Material Table S4. Observed school-level intracluster correlation coefficients for substance use outcomes**

| **Outcome** | **Assessment** | **N** | **Clusters** | **Prevalence** | **ICC** | **Mean cluster size** |
| --- | --- | --- | --- | --- | --- | --- |
| 30-day alcohol use | Baseline | 9010 | 68 | 5.5% | 0.006 | 132.3 |
| 30-day alcohol use | Post-intervention | 7496 | 68 | 9.7% | 0.005 | 110.0 |
| 30-day alcohol use | Follow-up | 5651 | 64 | 8.5% | 0.003 | 88.1 |
| 30-day tobacco use | Baseline | 8981 | 68 | 1.2% | 0.003 | 131.9 |
| 30-day tobacco use | Post-intervention | 7484 | 68 | 2.5% | 0.006 | 109.9 |
| 30-day tobacco use | Follow-up | 5630 | 64 | 2.2% | 0.000 | 87.8 |
| 30-day cannabis use | Baseline | 8980 | 68 | 1.0% | 0.005 | 131.9 |
| 30-day cannabis use | Post-intervention | 7473 | 68 | 1.8% | 0.006 | 109.7 |
| 30-day cannabis use | Follow-up | 5643 | 64 | 2.1% | 0.004 | 88.0 |
| 30-day drunkenness | Baseline | 9014 | 68 | 0.9% | 0.004 | 132.4 |
| 30-day drunkenness | Post-intervention | 7502 | 68 | 1.5% | 0.001 | 110.1 |
| 30-day drunkenness | Follow-up | 5647 | 64 | 1.3% | 0.004 | 88.0 |
| 12-month alcohol use | Baseline | 9011 | 68 | 15.8% | 0.006 | 132.3 |
| 12-month alcohol use | Post-intervention | 7495 | 68 | 21.9% | 0.007 | 110.0 |
| 12-month alcohol use | Follow-up | 5650 | 64 | 22.1% | 0.010 | 88.1 |
| 12-month tobacco use | Baseline | 8986 | 68 | 2.8% | 0.003 | 131.9 |
| 12-month tobacco use | Post-intervention | 7483 | 68 | 5.1% | 0.011 | 109.9 |
| 12-month tobacco use | Follow-up | 5630 | 64 | 5.4% | 0.003 | 87.8 |
| 12-month cannabis use | Baseline | 8972 | 68 | 2.9% | 0.008 | 131.7 |
| 12-month cannabis use | Post-intervention | 7473 | 68 | 4.5% | 0.013 | 109.7 |
| 12-month cannabis use | Follow-up | 5638 | 64 | 5.4% | 0.009 | 87.9 |
| 12-month drunkenness | Baseline | 9016 | 68 | 1.8% | 0.004 | 132.4 |
| 12-month drunkenness | Post-intervention | 7501 | 68 | 2.8% | 0.002 | 110.1 |
| 12-month drunkenness | Follow-up | 5651 | 64 | 3.2% | 0.008 | 88.1 |

**Note.** ICCs are one-way ANOVA estimates on the observed binary response scale, using available observations at each assessment. Negative raw ICCs, if any, were truncated to zero.
