# Supplementary material
Source: Research Square preprint supplement (doi:10.21203/rs.3.rs-10009053/v1)
Supplement: Supplementary file 4 [file 681cc73958eb4a0c5d8c5cf3.docx]

**Supplementary Table S1. Description of outcome and cognitive and psychological measures**

| **Construct** | **Instrument** | **Items** | **Response format** | **Score range / analyzed variable** | **Interpretation** |
| --- | --- | --- | --- | --- | --- |
| Tobacco use, alcohol use, cannabis use, alcohol intoxication | EU-Dap questionnaire | Substance-specific items | Self-report frequency items | Binary indicators: past 30-day use/intoxication yes/no | Higher prevalence indicates greater substance use |
| Positive beliefs about tobacco | EU-Dap questionnaire | 4 | 4-point Likert-type | 4–16 | Higher scores indicate stronger positive beliefs about tobacco |
| Negative beliefs about tobacco | EU-Dap questionnaire | 4 | 4-point Likert-type | 4–16 | Higher scores indicate stronger negative beliefs about tobacco |
| Positive beliefs about alcohol | EU-Dap questionnaire | 5 | 4-point Likert-type | 5–20 | Higher scores indicate stronger positive beliefs about alcohol |
| Negative beliefs about alcohol | EU-Dap questionnaire | 5 | 4-point Likert-type | 5–20 | Higher scores indicate stronger negative beliefs about alcohol |
| Positive beliefs about marijuana | EU-Dap questionnaire | 4 | 4-point Likert-type | 4–16 | Higher scores indicate stronger positive beliefs about marijuana |
| Negative beliefs about marijuana | EU-Dap questionnaire | 6 | 4-point Likert-type | 6–24 | Higher scores indicate stronger negative beliefs about marijuana |
| Future substance use intentions | EU-Dap questionnaire | 6 | 4-point Likert-type | 6–24 | Higher scores indicate stronger intentions or expectations of future substance use |
| Normative beliefs | EU-Dap questionnaire | 3 | 4-point ordinal items | 3-12 | Higher scores indicate greater perceived substance use among peers |
| Risk perception | EU-Dap questionnaire | 8 | 4-point ordinal items | 8–32 | Higher scores indicate greater perceived risk of substance use |
| Refusal skills | EU-Dap questionnaire | 3 | 4-point ordinal items | 3-12 | Higher scores indicate greater perceived ability to refuse substance offers |
| School bonding | EU-Dap questionnaire | 5 | 4-point Likert scale | 5-20 | Higher scores indicate stronger school bonding |
