# Supplementary material
Source: Research Square preprint supplement (doi:10.21203/rs.3.rs-10009053/v1)
Supplement: Supplementary file 5 [file eb88e047a9b4ae11a0b82c29.docx]

**Supplementary Material Table S5. Exploratory moderation by baseline substance use**

| **Outcome** | **Baseline events** | **Post-intervention interaction OR (95% CI)** | **Post p** | **Follow-up interaction OR (95% CI)** | **Follow-up p** |
| --- | --- | --- | --- | --- | --- |
| 30-day alcohol use | 655 | 0.83 (0.49–1.40) | .480 | 1.28 (0.72–2.30) | .398 |
| 30-day tobacco use | 151 | 0.66 (0.25–1.73) | .402 | 0.63 (0.19–2.09) | .451 |
| 30-day cannabis use | 107 | 0.67 (0.20–2.20) | .507 | 1.82 (0.47–7.10) | .387 |
| 30-day drunkenness | 91 | 0.81 (0.20–3.35) | .775 | 1.52 (0.17–13.79) | .712 |
| 12-month alcohol use | 2010 | 0.81 (0.55–1.19) | .285 | 1.27 (0.93–1.75) | .134 |
| 12-month tobacco use | 325 | 0.64 (0.33–1.24) | .188 | 0.69 (0.32–1.49) | .347 |
| 12-month cannabis use | 323 | 0.84 (0.40–1.77) | .646 | 0.90 (0.38–2.11) | .811 |
| 12-month drunkenness | 218 | 0.70 (0.31–1.59) | .392 | 1.76 (0.57–5.40) | .325 |

**Note.** Interaction ORs test whether the intervention effect differed according to baseline use of the same substance-use outcome. Models included group, time, baseline use, all interaction terms, sex, age, and grade, with robust standard errors clustered at the school level. None of the interaction terms was statistically significant.
